# Supplementary material for: Evidence for reversible light-dependent transitions in the photosynthetic pigments of diatoms
Source: Royal Society of Chemistry journal article supplement (doi:10.1039/d2ra05284a), 2022-01-01
Supplement: d2ra05284a1.pdf [file d2ra05284a1.pdf]

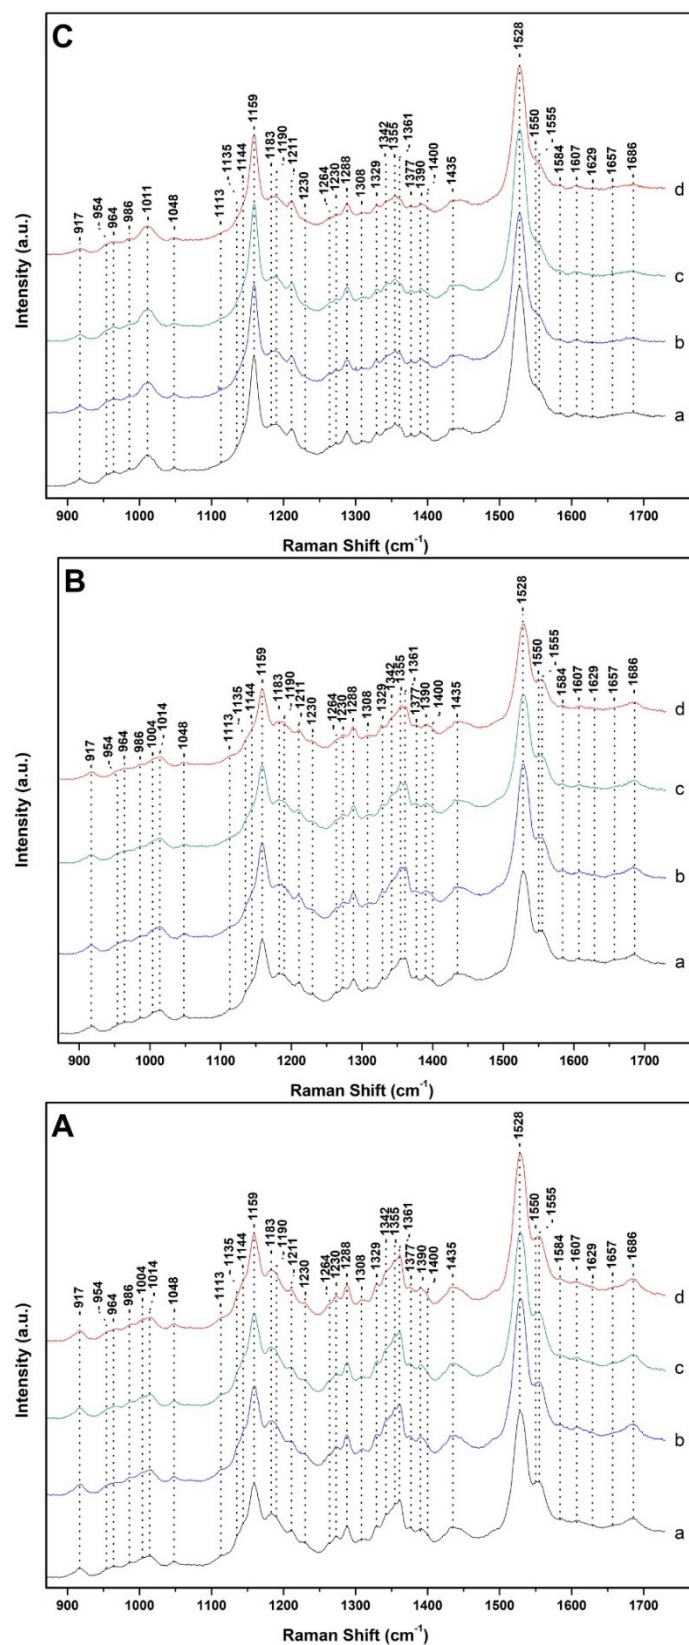

SI Figure 1. Resonance Raman spectra of the Low-light (LL, Panel A), Intermediate Light (IL, Panel B) and High Light (HL, Panels C). In each panel, spectra a ,b ,c , and d correspond to a 10 min spectrum resulted from ten individual spectra of 60 sec each; total accumulation 10

min. The sum of the four spectra ( a+b+c+d) in each panel are the spectra of the 40 min presented in the paper.

Table SI. Raman Frequencies of the marker bands of Fx, Dd, Chl *a* and Chl *c* under IL, LL and HL growth conditions. (+) indicates an increase in the intensity and (-) a decrease in the intensity.

|                                                 | <b>Band Position (cm<sup>-1</sup>)</b> |           |              |
|-------------------------------------------------|----------------------------------------|-----------|--------------|
|                                                 | LL                                     | IL        | HL           |
| <i>Fx</i> ( <i>v</i> <sub>1</sub> )             | 1528                                   | 1528      | 1528         |
| <i>Fx</i> ( <i>v</i> <sub>2</sub> )             | 1159                                   | 1159      | 1159         |
| <i>Fx</i> ( <i>v</i> <sub>3</sub> )             | 1004/1014                              | 1004/1014 | 1004/1014(-) |
| <i>Fx</i> ( <i>v</i> <sub>4</sub> )             | 964                                    | 964       | 964          |
| <i>Dd/Dt</i> ( <i>v</i> <sub>1</sub> )          | 1528                                   | 1528      | 1528(+)      |
| <i>Dd/Dt</i> ( <i>v</i> <sub>2</sub> )          | 1159                                   | 1159      | 1159(+)      |
| <i>Dd/Dt</i> ( <i>v</i> <sub>3</sub> )          | 1011                                   | 1011      | 1011(+)      |
| <i>Dd/Dt</i> ( <i>v</i> <sub>4</sub> )          | 986                                    | 986       | 986          |
| <i>Chl a</i> ( <i>C</i> <sub>0</sub> <i>N</i> ) | 1342                                   | 1342      | 1342(-)      |
| <i>Chl a</i> ( <i>C</i> <sub>0</sub> <i>N</i> ) | 1377                                   | 1377      | 1377(-)      |
| <i>Chl c</i> ( <i>C</i> <sub>0</sub> <i>N</i> ) | 1355                                   | 1355      | 1355(-)      |
| <i>Chl c</i> ( <i>C</i> <sub>0</sub> <i>N</i> ) | 1361                                   | 1361(-)   | 1361(-)      |
